# Supplementary material for: Incidence of Upper Extremity Deep Vein Thrombosis in Acute Leukemia and Effect on Mortality
Source: PubMed Central journal article supplement (PMC7593117; doi:10.1055/s-0040-1718883), 2020-10-28
Supplement: 10-1055-s-0040-1718883-s200046.pdf [file 10-1055-s-0040-1718883-s200046.pdf]

**Supplementary Table S1** International Classification of Disease, Ninth Revision, Clinical Modification (ICD-9-CM) codes used to identify venous thromboembolism (VTE) and bleeding

| Code                | Category | Description                                                                   |
|---------------------|----------|-------------------------------------------------------------------------------|
| <b>VTE</b>          |          |                                                                               |
| 415.11 <sup>a</sup> | PE       | Iatrogenic pulmonary embolism and infarction                                  |
| 415.13 <sup>a</sup> | PE       | Saddle embolus of pulmonary artery                                            |
| 415.19 <sup>a</sup> | PE       | Other pulmonary embolism and infarction                                       |
| 673.2 <sup>a</sup>  | PE       | Obstetrical blood clot embolism                                               |
| 451.11              | LE DVT   | Thrombophlebitis of deep vessels of lower extremities, femoral vein           |
| 451.19              | LE DVT   | Thrombophlebitis of deep vessel of lower extremities, other                   |
| 451.81              | LE DVT   | Thrombophlebitis of other sites, iliac vein                                   |
| 453.2               | LE DVT   | Venous thrombosis of inferior vena cava                                       |
| 453.4               | LE DVT   | Acute venous thrombosis of unspecified deep vessels of lower extremity        |
| 453.41 <sup>a</sup> | LE DVT   | Acute venous thrombosis of deep vessels of proximal lower extremity           |
| 453.42 <sup>a</sup> | LE DVT   | Acute venous thrombosis of deep vessels of distal lower extremity             |
| 453.8               | LE DVT   | Acute venous thrombosis of other specified veins (eliminated October 1, 2009) |
| 453.89              | LE DVT   | Acute venous thrombosis of other specified veins                              |
| 453.9               | LE DVT   | Acute venous thrombosis of unspecified site                                   |
| 671.31 <sup>a</sup> | LE DVT   | DVT antepartum—delivered                                                      |
| 671.33 <sup>a</sup> | LE DVT   | DVT antepartum                                                                |
| 671.42 <sup>a</sup> | LE DVT   | DVT postpartum—delivered                                                      |
| 671.44 <sup>a</sup> | LE DVT   | DVT postpartum                                                                |
| <b>Bleeding</b>     |          |                                                                               |
| 430                 | ICH      | Nontraumatic subarachnoid hemorrhage                                          |
| 431                 | ICH      | Nontraumatic intracerebral hemorrhage                                         |
| 432                 | ICH      | Nontraumatic extradural hemorrhage                                            |
| 432.1               | ICH      | Subdural hemorrhage                                                           |
| 432.9               | ICH      | Intracranial hemorrhage, NOS                                                  |
| 456                 | GI       | Esophagus varices w/bleed                                                     |
| 456.2               | GI       | Bleed esophagus varices other disease                                         |
| 530.7               | GI       | Mallory-Weiss syndrome                                                        |

(Continued)

| Code            | Category | Description                                                         |
|-----------------|----------|---------------------------------------------------------------------|
| <b>Bleeding</b> |          |                                                                     |
| 530.82          | GI       | Esophageal hemorrhage (Begin 1993)                                  |
| 531             | GI       | Acute gastric ulcer w/hemorrhage, w/out obstruction                 |
| 531.01          | GI       | Acute gastric ulcer w/hemorrhage, w/obstruction                     |
| 531.2           | GI       | Acute gastric ulcer w/hemorrhage, w/perforation                     |
| 53121           | GI       | Acute gastric ulcer w/hemorrhage, w/perforation, and obstruction    |
| 531.4           | GI       | Chronic gastric ulcer w/hemorrhage, w/out obstruction               |
| 531.41          | GI       | Chronic gastric ulcer w/hemorrhage, w/obstruction                   |
| 531.6           | GI       | Chronic gastric ulcer w/hemorrhage, w/perforation                   |
| 531.61          | GI       | Chronic gastric ulcer w/hemorrhage, w/perforation, and obstruction  |
| 532             | GI       | Acute duodenal ulcer w/hemorrhage, w/out obstruction                |
| 532.01          | GI       | Acute duodenal ulcer w/hemorrhage, w/obstruction                    |
| 532.2           | GI       | Acute duodenal ulcer w/hemorrhage, w/perforation                    |
| 532.21          | GI       | Acute duodenal ulcer w/hemorrhage, w/perforation, and obstruction   |
| 532.4           | GI       | Chronic duodenal ulcer w/hemorrhage, w/out obstruction              |
| 532.41          | GI       | Chronic duodenal ulcer w/hemorrhage, w/obstruction                  |
| 532.6           | GI       | Chronic duodenal ulcer w/hemorrhage, w/perforation                  |
| 532.61          | GI       | Chronic duodenal ulcer w/hemorrhage, w/perforation, and obstruction |
| 533             | GI       | Acute peptic ulcer w/hemorrhage, w/out obstruction                  |
| 533.01          | GI       | Acute peptic ulcer w/hemorrhage, w/obstruction                      |
| 533.2           | GI       | Acute peptic ulcer w/hemorrhage, w/perforation                      |
| 533.21          | GI       | Acute peptic ulcer w/hemorrhage, w/perforation, and obstruction     |
| 53340           | GI       | Chronic peptic ulcer w/hemorrhage, w/out obstruction                |

(Continued)

| Code            | Category | Description                                                              |
|-----------------|----------|--------------------------------------------------------------------------|
| <b>Bleeding</b> |          |                                                                          |
| 533.41          | GI       | Chronic peptic ulcer w/hemorrhage, w/obstruction                         |
| 533.6           | GI       | Chronic peptic ulcer w/hemorrhage, w/perforation                         |
| 533.61          | GI       | Chronic peptic ulcer w/hemorrhage, w/perforation, and obstruction        |
| 534             | GI       | Acute gastrojejunal ulcer w/hemorrhage, w/out obstruction                |
| 534.01          | GI       | Acute gastrojejunal ulcer w/hemorrhage, w/obstruction                    |
| 534.2           | GI       | Acute gastrojejunal ulcer w/hemorrhage, w/perforation                    |
| 534.21          | GI       | Acute gastrojejunal ulcer w/hemorrhage, w/perforation, and obstruction   |
| 534.4           | GI       | Chronic gastrojejunal ulcer w/hemorrhage, w/out obstruction              |
| 534.41          | GI       | Chronic gastrojejunal ulcer w/hemorrhage, w/obstruction                  |
| 534.6           | GI       | Chronic gastrojejunal ulcer w/hemorrhage, w/perforation                  |
| 534.61          | GI       | Chronic gastrojejunal ulcer w/hemorrhage, w/perforation, and obstruction |
| 535.01          | GI       | Acute gastritis w/hemorrhage                                             |
| 535.11          | GI       | Atrophic gastritis w/hemorrhage                                          |
| 535.21          | GI       | Gastric mucosal hypertrophy w/hemorrhage                                 |
| 535.31          | GI       | Alcoholic gastritis w/hemorrhage                                         |
| 535.41          | GI       | Other specified gastritis w/hemorrhage                                   |
| 535.51          | GI       | Unspecified gastritis and gastro-duodenitis w/hemorrhage                 |
| 535.61          | GI       | Duodenitis w/hemorrhage                                                  |
| 537.83          | GI       | Angiodysplasia of stomach and duodenum w/hemorrhage                      |
| 562.02          | GI       | Diverticulosis of small intestine w/hemorrhage                           |
| 562.03          | GI       | Diverticulitis of small intestine w/hemorrhage                           |
| 562.12          | GI       | Diverticulosis of colon w/hemorrhage                                     |
| 562.13          | GI       | Diverticulitis of colon w/hemorrhage                                     |
| 569.3           | GI       | Rectal and anal hemorrhage                                               |
| 569.85          | GI       | Angiodysplasia of intestine w/hemorrhage                                 |
| 578             | GI       | Hematemesis                                                              |

(Continued)

(Continued)

| Code            | Category        | Description                                      |
|-----------------|-----------------|--------------------------------------------------|
| <b>Bleeding</b> |                 |                                                  |
| 578.1           | GI              | Melena                                           |
| 578.9           | GI              | Gastrointestinal hemorrhage, NOS                 |
| 626.2           | Menorrhagia     | Excessive menstruation                           |
| 784.7           | Epistaxis       | Epistaxis                                        |
| 360.43          | Intraocular     | Hemophthalmos                                    |
| 379.23          | Intraocular     | Vitreous hemorrhage                              |
| 362.81          | Intraocular     | Retinal hemorrhage                               |
| 599.71          | Gross hematuria | Gross hematuria                                  |
| 459             | Other bleed     | Hemorrhage, NOS                                  |
| 568.81          | Other bleed     | Hemoperitoneum                                   |
| 423             | Other bleed     | Hemopericardium                                  |
| 784.8           | Other bleed     | Hemorrhage from throat                           |
| 786.3           | Other bleed     | Hemoptysis, unspecified                          |
| 786.31          | Other bleed     | Acute idiopathic pulmonary hemorrhage in infants |
| 786.39          | Other bleed     | Other hemoptysis                                 |
| 719.1           | Other bleed     | Hemarthrosis, site unspecified                   |
| 719.11          | Other bleed     | Hemarthrosis, shoulder region                    |
| 719.12          | Other bleed     | Hemarthrosis, upper arm                          |
| 719.13          | Other bleed     | Hemarthrosis, forearm                            |
| 719.14          | Other bleed     | Hemarthrosis, h&                                 |
| 719.15          | Other bleed     | Hemarthrosis, pelvic region and thigh            |
| 719.16          | Other bleed     | Hemarthrosis, lower leg                          |
| 719.17          | Other bleed     | Hemarthrosis, ankle and foot                     |
| 719.18          | Other bleed     | Hemarthrosis, other specified sites              |
| 719.19          | Other bleed     | Hemarthrosis, multiple sites                     |

Abbreviations: GI, gastrointestinal hemorrhage; ICH, intracranial hemorrhage; LE DVT, lower extremity deep vein thrombosis; NOS, not otherwise specified; PE, pulmonary embolism; w/, with; w/out, without. <sup>a</sup>Codes were searched in all secondary positions (1–24).

**Supplementary Table S2** ICD-9-CM and CPT codes used to identify hematopoietic stem cell transplantation (HSCT)

| Code  | Description                                                    |
|-------|----------------------------------------------------------------|
| 41.01 | Autologous bone marrow transplant without purging.             |
| 41.04 | Autologous hematopoietic stem cell transplant without purging. |
| 41.07 | Autologous hematopoietic stem cell transplant with purging.    |
| 41.09 | Autologous bone marrow transplant with purging.                |
| 41.05 | Allogeneic hematopoietic stem cell transplant without purging. |
| 41.08 | Allogeneic hematopoietic stem cell transplant with purging.    |
| 41.06 | Cord blood stem cell transplant.                               |
| 41.91 | Aspiration of bone marrow from donor for transplant.           |
| 99.79 | Apheresis (harvest) of stem cells.                             |

Abbreviations: CPT, current procedural terminology; ICD-9-CM, International Classification of Disease, Ninth Revision, Clinical Modification.

**Supplementary Table S3** Risk factors associated with subsequent bleeding after incident upper extremity deep vein thrombosis among treated acute myeloid leukemia patients in California, 2009 to 2014

| Variables                               | HR        | 95% CI       | p-Value |
|-----------------------------------------|-----------|--------------|---------|
| <i>UE DVT</i> <sup>a</sup>              |           |              |         |
| Yes                                     | 2.07      | (1.60, 2.68) | <0.0001 |
| No                                      | Reference |              |         |
| <i>HSCT</i> <sup>a</sup>                |           |              |         |
| Yes                                     | 0.97      | (0.69, 1.37) | 0.8654  |
| No                                      | Reference |              |         |
| <i>Gender</i>                           |           |              |         |
| Female                                  | 1.03      | (0.89, 1.18) | 0.7175  |
| Male                                    | Reference |              |         |
| <i>Race/Ethnicity</i>                   |           |              |         |
| non-Hispanic White                      | Reference |              |         |
| African American                        | 1.13      | (0.82, 1.55) | 0.4651  |
| Hispanic                                | 1.25      | (1.06, 1.48) | 0.0093  |
| Asian/Pacific Islander                  | 1.48      | (1.21, 1.81) | 0.0002  |
| <i>Age at diagnosis</i>                 |           |              |         |
| <50                                     | Reference |              |         |
| 50–59                                   | 0.66      | (0.53, 0.83) | 0.0003  |
| 60–69                                   | 0.75      | (0.61, 0.92) | 0.0053  |
| ≥70                                     | 0.66      | (0.54, 0.81) | <0.0001 |
| <i>Comorbidities (within 2 y prior)</i> |           |              |         |
| Not available                           | 1.05      | (0.74, 1.47) | 0.7997  |
| 0                                       | Reference |              |         |
| 1–2                                     | 1.03      | (0.74, 1.43) | 0.8557  |
| ≥3                                      | 1.08      | (0.77, 1.51) | 0.6696  |

Abbreviations: AML, acute myeloid leukemia; DVT, deep vein thrombosis; HSCT, hematopoietic stem cell transplantation; UE, upper extremity; VTE, venous thromboembolism.

Note: Multivariable cox proportional hazards model is stratified by AML subtype and adjusted for the competing risk of death and VTE using Fine and Gray methodology.

<sup>a</sup>UE DVT and HSCT are included as time-dependent covariates.

**Supplementary Table S4** Risk factors associated with subsequent bleeding after incident upper extremity deep vein thrombosis among treated acute lymphoblastic leukemia patients in California, 2009–2014

| Variables                  | HR        | 95% CI       | p-Value |
|----------------------------|-----------|--------------|---------|
| <i>UE DVT</i> <sup>a</sup> |           |              |         |
| Yes                        | 1.62      | (1.02, 2.57) | 0.0393  |
| No                         | Reference |              |         |
| <i>HSCT</i> <sup>a</sup>   |           |              |         |
| Yes                        | 1.18      | (0.70, 1.99) | 0.5275  |
| No                         | Reference |              |         |
| <i>Gender</i>              |           |              |         |
| Female                     | 1.00      | (0.82, 1.23) | 0.9934  |
| Male                       | Reference |              |         |
| <i>Race/Ethnicity</i>      |           |              |         |
| non-Hispanic White         | Reference |              |         |
| African American           | 1.53      | (0.95, 2.46) | 0.0802  |
| Hispanic                   | 1.47      | (1.14, 1.89) | 0.0028  |
| Asian/Pacific Islander     | 1.70      | (1.19, 2.43) | 0.0033  |
| <i>Age at diagnosis</i>    |           |              |         |
| <18                        | Reference |              |         |
| 18–29                      | 2.37      | (1.83, 3.07) | <0.0001 |
| 30–39                      | 1.49      | (1.02, 2.16) | 0.0396  |
| 40–49                      | 1.82      | (1.23, 2.68) | 0.0026  |
| 50–59                      | 2.45      | (1.79, 3.35) | <0.0001 |
| ≥60                        | 1.62      | (1.06, 2.49) | 0.0254  |

Abbreviations: CI, confidence interval; DVT, deep vein thrombosis; HR, hazard ratio; HSCT, hematopoietic stem cell transplantation; UE, upper extremity; VTE, venous thromboembolism.

Note: Multivariable cox proportional hazards model is stratified by comorbidities and adjusted for the competing risk of death and VTE using fine and gray methodology.

<sup>a</sup>UE DVT and HSCT are included as time-dependent covariates.
